# Supplementary material for: Rare Variant Burden Analysis within Enhancers Identifies CAV1 as an ALS Risk Gene
Source: PubMed Central journal article supplement (PMC7710676; doi:10.1016/j.celrep.2020.108456), 2020-12-01
Supplement: mmc1.pdf [file mmc1.pdf]

## Supplemental Information

### Rare Variant Burden Analysis within Enhancers

#### Identifies *CAV1* as an ALS Risk Gene

Johnathan Cooper-Knock, Sai Zhang, Kevin P. Kenna, Tobias Moll, John P. Franklin, Samantha Allen, Helia Ghahremani Nezhad, Alfredo Iacoangeli, Nancy Y. Yacovzada, Chen Eitan, Eran Hornstein, Eran Ehilak, Petra Celadova, Daniel Bose, Sali Farhan, Simon Fishilevich, Doron Lancet, Karen E. Morrison, Christopher E. Shaw, Ammar Al-Chalabi, Project MinE ALS Sequencing Consortium, Jan H. Veldink, Janine Kirby, Michael P. Snyder, and Pamela J. Shaw

## Supplemental Information

### Rare Variant Burden Analysis within Enhancers

#### Identifies *CAV1* as an ALS Risk Gene

Johnathan Cooper-Knock, Sai Zhang, Kevin P. Kenna, Tobias Moll, John P. Franklin, Samantha Allen, Helia Ghahremani Nezhad, Alfredo Iacoangeli, Nancy Y. Yacovzada, Chen Eitan, Eran Hornstein, Eran Ehilak, Petra Celadova, Daniel Bose, Sali Farhan, Simon Fishilevich, Doron Lancet, Karen E. Morrison, Christopher E. Shaw, Ammar Al-Chalabi, Project MinE ALS Sequencing Consortium, Jan H. Veldink, Janine Kirby, Michael P. Snyder, and Pamela J. Shaw

**Table S1: Enhancer regions associated with CAV1/CAV2 or TBK1 expression in different tissues. Related to Figure 1**

| Gene Target | Chromosome | Start     | Finish    | Tissue          |
|-------------|------------|-----------|-----------|-----------------|
| CAV1        | chr7       | 116474804 | 116476617 | Tissue-agnostic |
| CAV1        | chr7       | 116057349 | 116058637 | Tissue-agnostic |
| CAV1:CAV2   | chr7       | 116202174 | 116202561 | Tissue-agnostic |
| CAV1:CAV2   | chr7       | 115898310 | 115902716 | Tissue-agnostic |
| CAV1:CAV2   | chr7       | 116215990 | 116219157 | Tissue-agnostic |
| CAV1:CAV2   | chr7       | 115992110 | 115999387 | Tissue-agnostic |
| CAV1:CAV2   | chr7       | 116185994 | 116188883 | Tissue-agnostic |
| CAV1:CAV2   | chr7       | 116209195 | 116214933 | Tissue-agnostic |
| CAV1:CAV2   | chr7       | 116196622 | 116201351 | Tissue-agnostic |
| CAV1:CAV2   | chr7       | 116149154 | 116154310 | Tissue-agnostic |
| CAV1:CAV2   | chr7       | 116220723 | 116224531 | Tissue-agnostic |
| CAV1:CAV2   | chr7       | 116033656 | 116036708 | Tissue-agnostic |
| CAV2        | chr7       | 116078147 | 116088487 | Tissue-agnostic |
| CAV2        | chr7       | 115954125 | 115959325 | Tissue-agnostic |
| CAV2        | chr7       | 116180927 | 116184847 | Tissue-agnostic |
| CAV2        | chr7       | 116231455 | 116233866 | Tissue-agnostic |
| CAV2        | chr7       | 116065132 | 116068292 | Tissue-agnostic |
| CAV2        | chr7       | 116094877 | 116096147 | Tissue-agnostic |
| CAV2        | chr7       | 116003024 | 116004444 | Tissue-agnostic |
| CAV2        | chr7       | 116071887 | 116076515 | Tissue-agnostic |
| CAV2        | chr7       | 116176051 | 116176914 | Tissue-agnostic |
| CAV2        | chr7       | 116261779 | 116262057 | Tissue-agnostic |
| CAV2        | chr7       | 116062851 | 116064462 | Tissue-agnostic |
| CAV2        | chr7       | 116134797 | 116136789 | Tissue-agnostic |
| CAV2        | chr7       | 116154567 | 116155823 | Tissue-agnostic |
| CAV2        | chr7       | 116104521 | 116107038 | Tissue-agnostic |
| CAV1        | chr7       | 115816693 | 115817206 | CNS             |
| CAV1        | chr7       | 115853719 | 115854235 | CNS             |
| CAV1        | chr7       | 115870180 | 115870885 | CNS             |
| CAV1        | chr7       | 115871349 | 115873794 | CNS             |
| CAV1        | chr7       | 115910552 | 115913260 | CNS             |
| CAV1        | chr7       | 115913518 | 115914249 | CNS             |
| CAV1        | chr7       | 115955578 | 115958367 | CNS             |
| CAV1        | chr7       | 115967434 | 115969066 | CNS             |
| CAV1        | chr7       | 115993415 | 115996411 | CNS             |
| CAV1        | chr7       | 116034665 | 116036373 | CNS             |
| CAV1        | chr7       | 116066587 | 116067242 | CNS             |
| CAV1        | chr7       | 116073579 | 116076380 | CNS             |
| CAV1        | chr7       | 116080916 | 116084930 | CNS             |
| CAV1        | chr7       | 116094659 | 116096095 | CNS             |
| CAV1        | chr7       | 116103858 | 116107331 | CNS             |
| CAV1        | chr7       | 116118084 | 116119473 | CNS             |
| CAV1        | chr7       | 116149961 | 116153401 | CNS             |
| CAV1        | chr7       | 115898864 | 115900695 | CNS             |

|      |      |           |           |     |
|------|------|-----------|-----------|-----|
| CAV1 | chr7 | 115867068 | 115868903 | CNS |
| CAV1 | chr7 | 115996955 | 115998734 | CNS |
| CAV1 | chr7 | 116170083 | 116171009 | CNS |
| CAV1 | chr7 | 116175367 | 116176059 | CNS |
| CAV1 | chr7 | 116181441 | 116182810 | CNS |
| CAV1 | chr7 | 116182954 | 116183855 | CNS |
| CAV1 | chr7 | 116186806 | 116188332 | CNS |
| CAV1 | chr7 | 116195961 | 116196301 | CNS |
| CAV1 | chr7 | 116199565 | 116200132 | CNS |
| CAV1 | chr7 | 116206178 | 116207412 | CNS |
| CAV1 | chr7 | 116213507 | 116219235 | CNS |
| CAV1 | chr7 | 116221274 | 116225513 | CNS |
| CAV1 | chr7 | 116207998 | 116213360 | CNS |
| CAV1 | chr7 | 116227556 | 116229293 | CNS |
| CAV1 | chr7 | 116268838 | 116269440 | CNS |
| CAV1 | chr7 | 116273324 | 116274010 | CNS |
| CAV1 | chr7 | 116327276 | 116331188 | CNS |
| CAV1 | chr7 | 116331287 | 116334384 | CNS |
| CAV1 | chr7 | 116345275 | 116345781 | CNS |
| CAV1 | chr7 | 116345958 | 116349052 | CNS |
| CAV1 | chr7 | 116353124 | 116354955 | CNS |
| CAV1 | chr7 | 116355221 | 116357861 | CNS |
| CAV1 | chr7 | 116411044 | 116413659 | CNS |
| CAV1 | chr7 | 116415730 | 116419494 | CNS |
| CAV1 | chr7 | 116421735 | 116423410 | CNS |
| CAV1 | chr7 | 116341997 | 116343027 | CNS |
| CAV1 | chr7 | 116439854 | 116443746 | CNS |
| CAV1 | chr7 | 114429291 | 114431269 | CNS |
| CAV1 | chr7 | 114525449 | 114526553 | CNS |
| CAV1 | chr7 | 114529275 | 114530372 | CNS |
| CAV1 | chr7 | 114567780 | 114569045 | CNS |
| CAV1 | chr7 | 114569345 | 114571951 | CNS |
| CAV1 | chr7 | 114573849 | 114576684 | CNS |
| CAV1 | chr7 | 114583410 | 114585966 | CNS |
| CAV1 | chr7 | 114627975 | 114630075 | CNS |
| CAV1 | chr7 | 114648866 | 114650794 | CNS |
| CAV1 | chr7 | 114680511 | 114680894 | CNS |
| CAV1 | chr7 | 114870292 | 114872289 | CNS |
| CAV1 | chr7 | 114939946 | 114941012 | CNS |
| CAV1 | chr7 | 114992058 | 114993494 | CNS |
| CAV1 | chr7 | 115186013 | 115186673 | CNS |
| CAV1 | chr7 | 115301123 | 115304100 | CNS |
| CAV1 | chr7 | 115304366 | 115304820 | CNS |
| CAV1 | chr7 | 115310813 | 115313335 | CNS |
| CAV1 | chr7 | 115317812 | 115318384 | CNS |
| CAV1 | chr7 | 115318462 | 115319029 | CNS |
| CAV1 | chr7 | 115737105 | 115737568 | CNS |
| CAV1 | chr7 | 116502110 | 116504190 | CNS |

|      |       |           |           |                 |
|------|-------|-----------|-----------|-----------------|
| CAV1 | chr7  | 116511658 | 116512938 | CNS             |
| CAV1 | chr7  | 116551519 | 116552444 | CNS             |
| CAV1 | chr7  | 116638294 | 116639676 | CNS             |
| CAV1 | chr7  | 116645209 | 116646095 | CNS             |
| CAV1 | chr7  | 116701473 | 116702466 | CNS             |
| CAV1 | chr7  | 116738137 | 116738529 | CNS             |
| CAV1 | chr7  | 116738883 | 116739229 | CNS             |
| CAV1 | chr7  | 116764255 | 116764795 | CNS             |
| CAV1 | chr7  | 116764919 | 116766070 | CNS             |
| CAV1 | chr7  | 116771574 | 116774341 | CNS             |
| CAV1 | chr7  | 116797868 | 116798377 | CNS             |
| CAV1 | chr7  | 116869939 | 116871410 | CNS             |
| CAV1 | chr7  | 116908705 | 116911053 | CNS             |
| CAV1 | chr7  | 116923096 | 116924277 | CNS             |
| CAV1 | chr7  | 117222645 | 117223108 | CNS             |
| CAV1 | chr7  | 117305812 | 117306347 | CNS             |
| CAV1 | chr7  | 117468242 | 117468792 | CNS             |
| CAV1 | chr7  | 114458233 | 114460475 | CNS             |
| CAV1 | chr7  | 114572709 | 114573331 | CNS             |
| CAV1 | chr7  | 114785263 | 114786500 | CNS             |
| CAV1 | chr7  | 115670883 | 115671400 | CNS             |
| CAV1 | chr7  | 116899318 | 116900524 | CNS             |
| TBK1 | chr12 | 64976982  | 64978649  | Tissue-agnostic |
| TBK1 | chr12 | 64849299  | 64852075  | Tissue-agnostic |
| TBK1 | chr12 | 64855048  | 64856317  | Tissue-agnostic |
| TBK1 | chr12 | 65194398  | 65194833  | Tissue-agnostic |
| TBK1 | chr12 | 65139887  | 65142519  | Tissue-agnostic |
| TBK1 | chr12 | 64349522  | 64350375  | Tissue-agnostic |
| TBK1 | chr12 | 64988381  | 64990575  | Tissue-agnostic |
| TBK1 | chr12 | 64852385  | 64854077  | Tissue-agnostic |
| TBK1 | chr12 | 65058182  | 65079989  | Tissue-agnostic |
| TBK1 | chr12 | 64479266  | 64484481  | Tissue-agnostic |
| TBK1 | chr12 | 64943421  | 64943781  | Tissue-agnostic |
| TBK1 | chr12 | 64953898  | 64955793  | Tissue-agnostic |
| TBK1 | chr12 | 64490881  | 64493995  | Tissue-agnostic |

**Figure S1: qPCR measurement of TBK1 mRNA expression relative to mean expression in normal controls.** Expression normalised relative to loading control. Related to Figure 1.

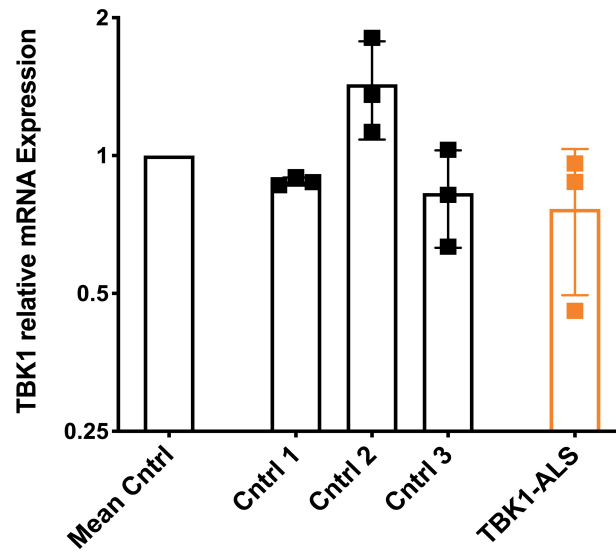

**Table S2: Genetic variants within CAV1/CAV2 enhancer regions. D(i)=Discovery cohort; tissue-agnostic enhancers; D(ii)=Discovery cohort, CNS enhancers; R=Replication cohort. Related to Figure 1.**

| Variants           | ALS Frequency | Control Frequency | Cohort | Variants           | ALS Frequency | Control Frequency | Cohort |
|--------------------|---------------|-------------------|--------|--------------------|---------------|-------------------|--------|
| chr7:115899988:T:C | 0.00022       | 0                 | D(i)   | chr7:115994719:G:A | 0.000889878   | 0.001038961       | D (ii) |
| chr7:115900605:A:G | 0.00022       | 0                 | D(i)   | chr7:115994770:C:G | 0.000222469   | 0                 | D (ii) |
| chr7:115994269:C:T | 0.00044       | 0                 | D(i)   | chr7:115994869:C:T | 0.000222469   | 0                 | D (ii) |
| chr7:115994303:G:A | 0.00044       | 0                 | D(i)   | chr7:115994875:C:T | 0.000222469   | 0                 | D (ii) |
| chr7:115994310:A:G | 0             | 0.00052           | D(i)   | chr7:115995110:A:G | 0.000444939   | 0                 | D (ii) |
| chr7:115994595:T:G | 0.00022       | 0                 | D(i)   | chr7:115995386:G:A | 0             | 0.000519481       | D (ii) |
| chr7:115994627:T:C | 0.00022       | 0                 | D(i)   | chr7:115995411:C:G | 0.000222469   | 0                 | D (ii) |
| chr7:115994719:G:A | 0.00089       | 0.00104           | D(i)   | chr7:115996247:A:G | 0.000222469   | 0                 | D (ii) |
| chr7:115994770:C:G | 0.00022       | 0                 | D(i)   | chr7:115996338:G:C | 0.000222469   | 0                 | D (ii) |
| chr7:115994869:C:T | 0.00022       | 0                 | D(i)   | chr7:116035733:C:A | 0.000444939   | 0                 | D (ii) |
| chr7:115994875:C:T | 0.00022       | 0                 | D(i)   | chr7:116152216:C:T | 0.000222469   | 0.001038961       | D (ii) |
| chr7:115995110:A:G | 0.00044       | 0                 | D(i)   | chr7:116175470:A:G | 0.001557286   | 0.003116883       | D (ii) |
| chr7:115995386:G:A | 0             | 0.00052           | D(i)   | chr7:116175631:T:A | 0             | 0.000519481       | D (ii) |
| chr7:115995411:C:G | 0.00022       | 0                 | D(i)   | chr7:116175647:T:G | 0.000222469   | 0                 | D (ii) |
| chr7:115996247:A:G | 0.00022       | 0                 | D(i)   | chr7:116181928:T:C | 0             | 0.000519481       | D (ii) |
| chr7:115996338:G:C | 0.00022       | 0                 | D(i)   | chr7:116182530:A:G | 0.000222469   | 0                 | D (ii) |
| chr7:115996639:T:G | 0.00022       | 0                 | D(i)   | chr7:116182646:A:G | 0.000667408   | 0.003116883       | D (ii) |
| chr7:116034151:T:C | 0.00022       | 0                 | D(i)   | chr7:116182790:T:C | 0             | 0.000519481       | D (ii) |
| chr7:116035733:C:A | 0.00044       | 0                 | D(i)   | chr7:116211360:G:A | 0.000444939   | 0.004675325       | D (ii) |
| chr7:116152216:C:T | 0.00022       | 0.00104           | D(i)   | chr7:116211574:C:T | 0.000667408   | 0.000519481       | D (ii) |
| chr7:116198357:C:T | 0.00089       | 0                 | D(i)   | chr7:116212628:A:G | 0.000222469   | 0                 | D (ii) |
| chr7:116199522:T:C | 0.00022       | 0                 | D(i)   | chr7:116212861:A:G | 0.000222469   | 0                 | D (ii) |
| chr7:116200589:T:A | 0.00022       | 0                 | D(i)   | chr7:116213876:A:T | 0.000222469   | 0.001038961       | D (ii) |
| chr7:116200705:C:T | 0.00022       | 0                 | D(i)   | chr7:116217283:C:G | 0.000222469   | 0                 | D (ii) |
| chr7:116200719:C:A | 0.00022       | 0                 | D(i)   | chr7:116222625:T:C | 0.000444939   | 0                 | D (ii) |
| chr7:116200953:A:T | 0.00022       | 0                 | D(i)   | chr7:116223328:A:G | 0.000667408   | 0.000519481       | D (ii) |
| chr7:116200959:G:T | 0             | 0.00052           | D(i)   | chr7:116223448:C:T | 0.000222469   | 0                 | D (ii) |
| chr7:116201160:T:C | 0             | 0.00052           | D(i)   | chr7:116224152:G:A | 0.002002225   | 0.007272727       | D (ii) |
| chr7:116201160:T:G | 0             | 0.00052           | D(i)   | chr7:116273953:C:T | 0             | 0.000519481       | D (ii) |
| chr7:116211360:G:A | 0.00044       | 0.00468           | D(i)   | chr7:116273989:A:G | 0.000222469   | 0.000519481       | D (ii) |
| chr7:116211574:C:T | 0.00067       | 0.00052           | D(i)   | chr7:116327730:T:C | 0.000444939   | 0.000519481       | D (ii) |
| chr7:116212628:A:G | 0.00022       | 0                 | D(i)   | chr7:116330812:T:C | 0.000222469   | 0                 | D (ii) |
| chr7:116212861:A:G | 0.00022       | 0                 | D(i)   | chr7:116331129:T:C | 0             | 0.000519481       | D (ii) |
| chr7:116213876:A:T | 0.00022       | 0.00104           | D(i)   | chr7:116333491:C:T | 0.000222469   | 0                 | D (ii) |
| chr7:116217283:C:G | 0.00022       | 0                 | D(i)   | chr7:116333773:C:A | 0             | 0.000519481       | D (ii) |
| chr7:116222625:T:C | 0.00044       | 0                 | D(i)   | chr7:116342514:T:C | 0.000222469   | 0                 | D (ii) |
| chr7:116223328:A:G | 0.00067       | 0.00052           | D(i)   | chr7:116345315:A:G | 0.000222469   | 0                 | D (ii) |
| chr7:116223448:C:T | 0.00022       | 0                 | D(i)   | chr7:116346600:T:C | 0.000222469   | 0.000519481       | D (ii) |
| chr7:116224152:G:A | 0.00200       | 0.00727           | D(i)   | chr7:116347870:C:G | 0.000222469   | 0                 | D (ii) |
| chr7:116474819:G:T | 0.00067       | 0                 | D(i)   | chr7:116355771:G:A | 0.000222469   | 0                 | D (ii) |
| chr7:115957412:G:A | 0.00022       | 0                 | D(i)   | chr7:116356905:C:A | 0.002892102   | 0.001038961       | D (ii) |
| chr7:115957415:T:C | 0.00022       | 0                 | D(i)   | chr7:116356905:C:T | 0.000222469   | 0.000519481       | D (ii) |
| chr7:115957440:G:A | 0.00022       | 0                 | D(i)   | chr7:116357813:A:G | 0.000444939   | 0                 | D (ii) |

|                    |             |             |       |                    |             |             |       |
|--------------------|-------------|-------------|-------|--------------------|-------------|-------------|-------|
| chr7:115957498:C:A | 0.00022     | 0           | D(i)  | chr7:116412712:C:T | 0.000222469 | 0           | D(ii) |
| chr7:115957577:G:A | 0.00022     | 0.00052     | D(i)  | chr7:116415873:G:T | 0.000222469 | 0           | D(ii) |
| chr7:116004321:G:A | 0.00044     | 0           | D(i)  | chr7:116415881:T:G | 0.000222469 | 0           | D(ii) |
| chr7:116063605:A:G | 0           | 0.00052     | D(i)  | chr7:116415938:C:G | 0.000222469 | 0           | D(ii) |
| chr7:116063624:T:C | 0.00022     | 0           | D(i)  | chr7:116416799:C:T | 0.001112347 | 0           | D(ii) |
| chr7:116064199:T:C | 0.00022     | 0           | D(i)  | chr7:116416941:A:G | 0.000222469 | 0           | D(ii) |
| chr7:116087637:G:A | 0.00022     | 0           | D(i)  | chr7:116417019:A:G | 0.000222469 | 0           | D(ii) |
| chr7:116181928:T:C | 0           | 0.00052     | D(i)  | chr7:116419236:G:T | 0.001112347 | 0.001038961 | D(ii) |
| chr7:116182530:A:G | 0.00022     | 0           | D(i)  | chr7:116422352:C:T | 0.000222469 | 0           | D(ii) |
| chr7:116182646:A:G | 0.00067     | 0.00312     | D(i)  | chr7:116422362:G:T | 0.000222469 | 0           | D(ii) |
| chr7:116182790:T:C | 0           | 0.00052     | D(i)  | chr7:116422617:T:C | 0.000889878 | 0.001558442 | D(ii) |
| chr7:116184017:A:T | 0.00912     | 0.00987     | D(i)  | chr7:116422623:C:A | 0.005116796 | 0.002597403 | D(ii) |
| chr7:116184130:T:A | 0.00044     | 0           | D(i)  | chr7:116441514:T:C | 0.000222469 | 0           | D(ii) |
| chr7:116232009:G:C | 0           | 0.00052     | D(i)  | chr7:116441539:C:T | 0           | 0.000519481 | D(ii) |
| chr7:116233640:T:C | 0           | 0.00052     | D(i)  | chr7:116441559:C:A | 0           | 0.000519481 | D(ii) |
| chr7:114430787:C:G | 0.008008899 | 0.008311688 | D(ii) | chr7:116441604:C:A | 0.003114572 | 0.001038961 | D(ii) |
| chr7:114530323:G:A | 0.000222469 | 0.000519481 | D(ii) | chr7:116442636:T:A | 0.000222469 | 0           | D(ii) |
| chr7:114570572:C:A | 0           | 0.000519481 | D(ii) | chr7:116442680:C:T | 0.000222469 | 0           | D(ii) |
| chr7:114571016:G:A | 0           | 0.000519481 | D(ii) | chr7:116443482:C:T | 0.000222469 | 0           | D(ii) |
| chr7:114571375:G:C | 0.000222469 | 0           | D(ii) | chr7:116502532:G:C | 0           | 0.001038961 | D(ii) |
| chr7:114571427:G:T | 0           | 0.000519481 | D(ii) | chr7:116502617:C:G | 0.000222469 | 0           | D(ii) |
| chr7:114574678:G:A | 0.000222469 | 0           | D(ii) | chr7:116502985:G:C | 0.000222469 | 0           | D(ii) |
| chr7:114575111:A:C | 0.001334816 | 0           | D(ii) | chr7:116774049:T:C | 0.000222469 | 0           | D(ii) |
| chr7:114575748:A:G | 0.000444939 | 0           | D(ii) | chr7:116774169:C:T | 0.000222469 | 0           | D(ii) |
| chr7:114583529:T:C | 0.000222469 | 0           | D(ii) | chr7:116774262:G:T | 0.004004449 | 0.000519481 | D(ii) |
| chr7:114649995:C:A | 0.000222469 | 0           | D(ii) | chr7:116797872:G:A | 0.000222469 | 0           | D(ii) |
| chr7:114870400:T:G | 0.000222469 | 0           | D(ii) | chr7:116909821:G:A | 0.000222469 | 0           | D(ii) |
| chr7:114870987:C:T | 0.000222469 | 0           | D(ii) | chr7:116910136:C:A | 0           | 0.000519481 | D(ii) |
| chr7:114871000:G:C | 0.000222469 | 0           | D(ii) | chr7:116910162:C:G | 0.000222469 | 0           | D(ii) |
| chr7:114871004:A:T | 0           | 0.000519481 | D(ii) | chr7:116910505:A:C | 0.000222469 | 0           | D(ii) |
| chr7:114871090:C:T | 0.000889878 | 0.001038961 | D(ii) | chr7:117306108:T:C | 0.000222469 | 0           | D(ii) |
| chr7:114871798:T:C | 0.000667408 | 0           | D(ii) | chr7:117468457:C:T | 0.000889878 | 0.001038961 | D(ii) |
| chr7:114940467:A:G | 0.000444939 | 0           | D(ii) | chr7:117468773:A:G | 0.000444939 | 0.000519481 | D(ii) |
| chr7:114940537:T:C | 0           | 0.000519481 | D(ii) | chr7:114430749:G:T | 0.000593472 | 0           | R     |
| chr7:114940606:C:T | 0.000222469 | 0           | D(ii) | chr7:114870400:T:G | 0.001186944 | 0           | R     |
| chr7:115302267:G:A | 0.000222469 | 0           | D(ii) | chr7:114871090:C:T | 0.000593472 | 0           | R     |
| chr7:115302388:C:T | 0.000222469 | 0           | D(ii) | chr7:114871798:T:C | 0.000593472 | 0           | R     |
| chr7:115302422:A:G | 0.000222469 | 0           | D(ii) | chr7:114940077:A:G | 0.000593472 | 0           | R     |
| chr7:115302425:G:T | 0.000222469 | 0           | D(ii) | chr7:114940422:T:A | 0.000593472 | 0           | R     |
| chr7:115312834:C:T | 0.000222469 | 0           | D(ii) | chr7:115302422:A:G | 0.000593472 | 0           | R     |
| chr7:115318030:G:A | 0.000222469 | 0           | D(ii) | chr7:115303637:A:G | 0.000593472 | 0           | R     |
| chr7:115318066:G:A | 0.001334816 | 0.000519481 | D(ii) | chr7:115313234:T:G | 0.000593472 | 0           | R     |
| chr7:115318198:G:A | 0.000222469 | 0           | D(ii) | chr7:115318066:G:A | 0.002967359 | 0.002247191 | R     |
| chr7:115318232:C:T | 0.000444939 | 0.000519481 | D(ii) | chr7:115318495:C:T | 0.000593472 | 0           | R     |
| chr7:115318257:A:T | 0.000222469 | 0           | D(ii) | chr7:115912442:G:A | 0.000593472 | 0           | R     |
| chr7:115318267:C:G | 0.000222469 | 0           | D(ii) | chr7:115968420:C:T | 0.001186944 | 0           | R     |
| chr7:115318323:G:C | 0.000222469 | 0           | D(ii) | chr7:115968431:A:G | 0.000593472 | 0           | R     |
| chr7:115318339:G:A | 0.000222469 | 0           | D(ii) | chr7:115994330:C:T | 0.000593472 | 0           | R     |



|                    |             |             |        |                    |             |             |   |
|--------------------|-------------|-------------|--------|--------------------|-------------|-------------|---|
| chr7:115670928:A:G | 0.001334816 | 0.001038961 | D (ii) | chr7:115995441:A:C | 0.000593472 | 0           | R |
| chr7:115867898:G:A | 0.000222469 | 0           | D (ii) | chr7:116152067:C:T | 0.000593472 | 0           | R |
| chr7:115899988:T:C | 0.000222469 | 0           | D (ii) | chr7:116175470:A:G | 0.000593472 | 0           | R |
| chr7:115900605:A:G | 0.000222469 | 0           | D (ii) | chr7:116175798:A:G | 0.000593472 | 0           | R |
| chr7:115911421:A:G | 0.000222469 | 0           | D (ii) | chr7:116223751:C:G | 0.001186944 | 0           | R |
| chr7:115911791:T:G | 0           | 0.000519481 | D (ii) | chr7:116273806:G:A | 0.000593472 | 0           | R |
| chr7:115957412:G:A | 0.000222469 | 0           | D (ii) | chr7:116327730:T:C | 0.000593472 | 0           | R |
| chr7:115957415:T:C | 0.000222469 | 0           | D (ii) | chr7:116331111:T:C | 0.000593472 | 0           | R |
| chr7:115957440:G:A | 0.000222469 | 0           | D (ii) | chr7:116342272:T:C | 0.000593472 | 0           | R |
| chr7:115957498:C:A | 0.000222469 | 0           | D (ii) | chr7:116347329:T:C | 0.000593472 | 0           | R |
| chr7:115957577:G:A | 0.000222469 | 0.000519481 | D (ii) | chr7:116416799:C:T | 0.000593472 | 0           | R |
| chr7:115968420:C:T | 0.000222469 | 0.000519481 | D (ii) | chr7:116419236:G:T | 0.001186944 | 0           | R |
| chr7:115968429:G:A | 0           | 0.000519481 | D (ii) | chr7:116422617:T:C | 0.000593472 | 0           | R |
| chr7:115968452:C:T | 0.000222469 | 0           | D (ii) | chr7:116422623:C:A | 0.007121662 | 0           | R |
| chr7:115994269:C:T | 0.000444939 | 0           | D (ii) | chr7:116645747:A:C | 0.000593472 | 0           | R |
| chr7:115994303:G:A | 0.000444939 | 0           | D (ii) | chr7:116774262:G:T | 0.005341246 | 0.004494382 | R |
| chr7:115994310:A:G | 0           | 0.000519481 | D (ii) | chr7:116910136:C:A | 0.000593472 | 0           | R |
| chr7:115994595:T:G | 0.000222469 | 0           | D (ii) | chr7:117468457:C:T | 0.000593472 | 0           | R |
| chr7:115994627:T:C | 0.000222469 | 0           | D (ii) |                    |             |             |   |

**Figure S2: Increased dendrite length and altered PAX6 expression confirms successful neuronal differentiation of SH-SY5Y cells.** Neuronal differentiated SH-SY5Y cells have increased dendrite length (A, \* $p < 0.05$ , paired t-test, Forster et al., 2016). PAX6 is a transcription factor with an important role in neuronal development; reduced expression of PAX6 is concurrent with neuronal differentiation of Sh-SY5Y cells (B, Forster et al., 2016). Related to Figure 3.

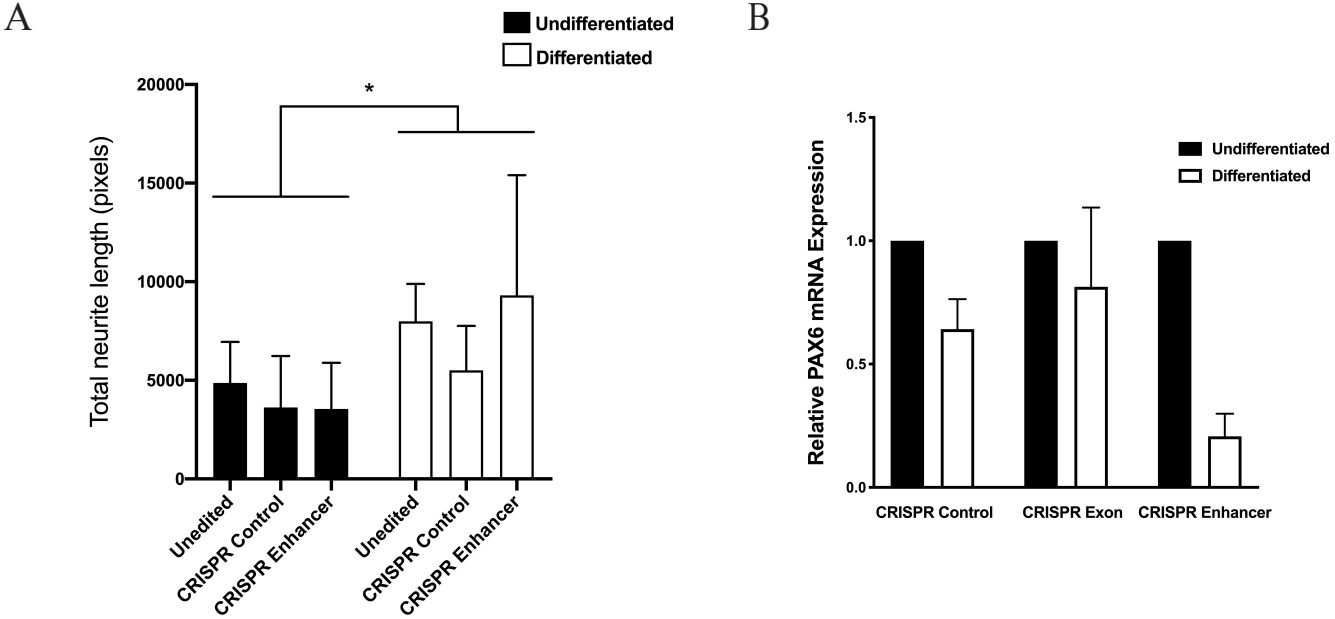

**Table S3: DNA and RNA oligonucleotide sequences.** Related to STAR Methods, 'CRISPR editing of mammalian cell lines'

|                                       |                                            |
|---------------------------------------|--------------------------------------------|
| <b>DNA oligos</b>                     |                                            |
| qPCR RPL13A FWD                       | 5'-CAAGCGGATGAACACCAACC-3'                 |
| qPCR RPL13A REV                       | 5'-TTTTGTGGGGCAGCATACCT-3'                 |
| qPCR GAPDH FWD                        | 5'-CAACTTTGGTATCGTGGAAGGAC-3'              |
| qPCR GAPDH REV                        | 5'-ACAGTCTTCTGGATGGCAGTG-3'                |
| qPCR Pax6 FWD                         | 5'-GTGCCCCTCCATCTTTGCTT-3'                 |
| qPCR Pax6 REV                         | 5'-GCGCCCATCTGTTGGTTTTTC-3'                |
| qPCR CAV1 FWD                         | 5'-CCAAGGAGATCGACCTGGTCAA-3'               |
| qPCR CAV1 REV                         | 5'-GCCGTCAAACTGTGTGTCCCT-3'                |
| qPCR CAV2                             | 5'-TTCTCTTTGCCACCCTCAGCTG-3'               |
| qPCR CAV2                             | 5'-GAAGCATCGTCCTACGCTCGTA-3'               |
| sequencing primers CAV enhancer 1 FWD | 5'-ACCCTCCAGCACTAATGGACTT-3'               |
| sequencing primers CAV enhancer 1 REV | 5'-CCTGAGTTGATGACCCTTCTCCT-3'              |
| sequencing primers CAV enhancer 2 FWD | 5'-CTGCATACGCTATAACCCGGC-3'                |
| sequencing primers CAV enhancer 2 REV | 5'-AGGTGTTTCGCTCCTCTGTC-3'                 |
| sequencing primers CAV exon FWD       | 5'-AGTACAGAGGGGTGTGGTGT-3'                 |
| sequencing primers CAV exon REV       | 5'-GGCTTACCTTGACCACGTCA-3'                 |
| <b>RNA Oligos (crRNA)</b>             |                                            |
| crRNA targeting CAV enhancer          | 5'-UUGUAAUCAGGAAUUUCCA+modified linker-3'  |
| crRNA targeting CAV exon              | 5'-AGUGUACGACGCGCACACCA+modified linker-3' |

**Table S4: Demographic information for patient-derived lymphoblastoid cell lines.** Related to STAR Methods, 'Patient-derived lymphoblastoid cells'

|                                       | <b>Genetic Variant</b>   | <b>Age at collection (years)</b> | <b>Sex (M/F)</b> |
|---------------------------------------|--------------------------|----------------------------------|------------------|
| <b>CAV1-coding mutations</b>          | p.Met111Val- <i>CAVI</i> | 51                               | M                |
|                                       | p.Pro132Ala- <i>CAVI</i> | 65                               | M                |
|                                       | p.Val155Ile- <i>CAVI</i> | 50                               | F                |
| <b>CAV1/CAV2-enhancer mutations</b>   | chr7:116222625T>C        | 72                               | M                |
|                                       | chr7:115994269C>T        | 53                               | F                |
| <b>TBK1-enhancer mutation</b>         | chr12:65059913G>A        | 73                               | M                |
| <b>ALS-controls</b>                   | -                        | 78                               | M                |
|                                       | -                        | 69                               | M                |
|                                       | -                        | 49                               | F                |
| <b>Neurologically normal controls</b> | -                        | 48                               | F                |
|                                       | -                        | 68                               | M                |
|                                       | -                        | 56                               | M                |
